# Supplementary material for: Room-temperature magnetism in two-dimensional metal–organic frameworks enabled by electrostatic gating
Source: Royal Society of Chemistry journal article supplement (doi:10.1039/d2ta08540b), 2023-01-01
Supplement: d2ta08540b1.pdf [file d2ta08540b1.pdf]

Supplementary Information

**Room-temperature magnetism in two-dimensional metal-organic frameworks enabled by electrostatic gating**

Qin Yu<sup>abc</sup> and Dong Wang<sup>ab\*</sup>

<sup>a</sup>Laboratory of Flexible Electronics Technology, Tsinghua University, Beijing 100084, P. R. China

<sup>b</sup>MOE Key Laboratory of Organic OptoElectronics and Molecular Engineering, Department of Chemistry, Tsinghua University, Beijing 100084, P. R. China

<sup>c</sup>Research Institute of Petroleum Processing, SINOPEC, Beijing 100083, P. R. China

\*E-mail: dong913@tsinghua.edu.cn

**This file contains nine figures and four tables**

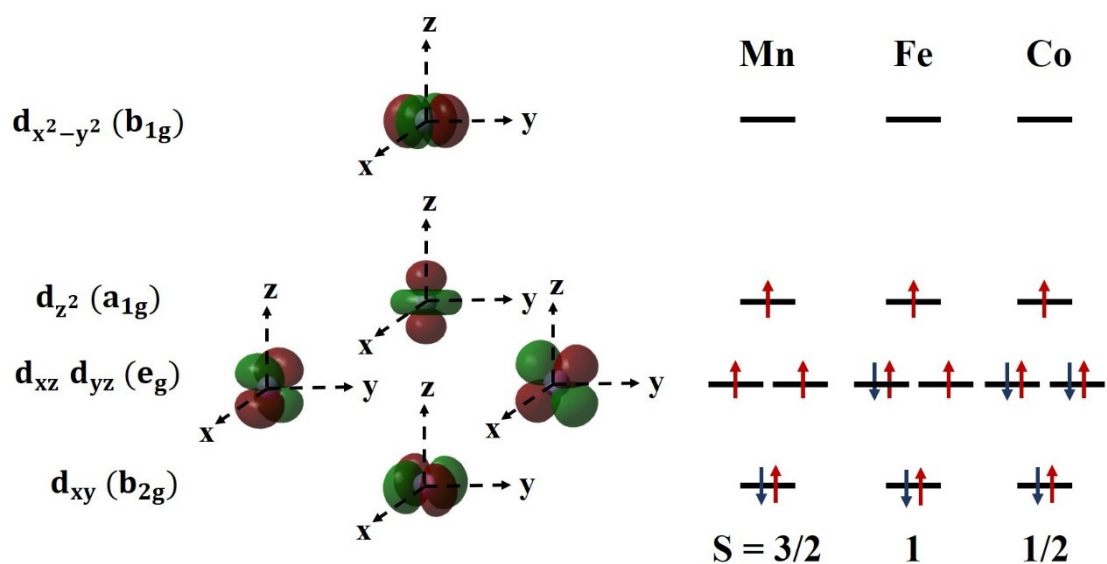

**Figure S1.** Schematics for the square-planar ligand field induced splitting of d-orbitals and filling of d-electrons of Mn, Fe and Co divalent ions.

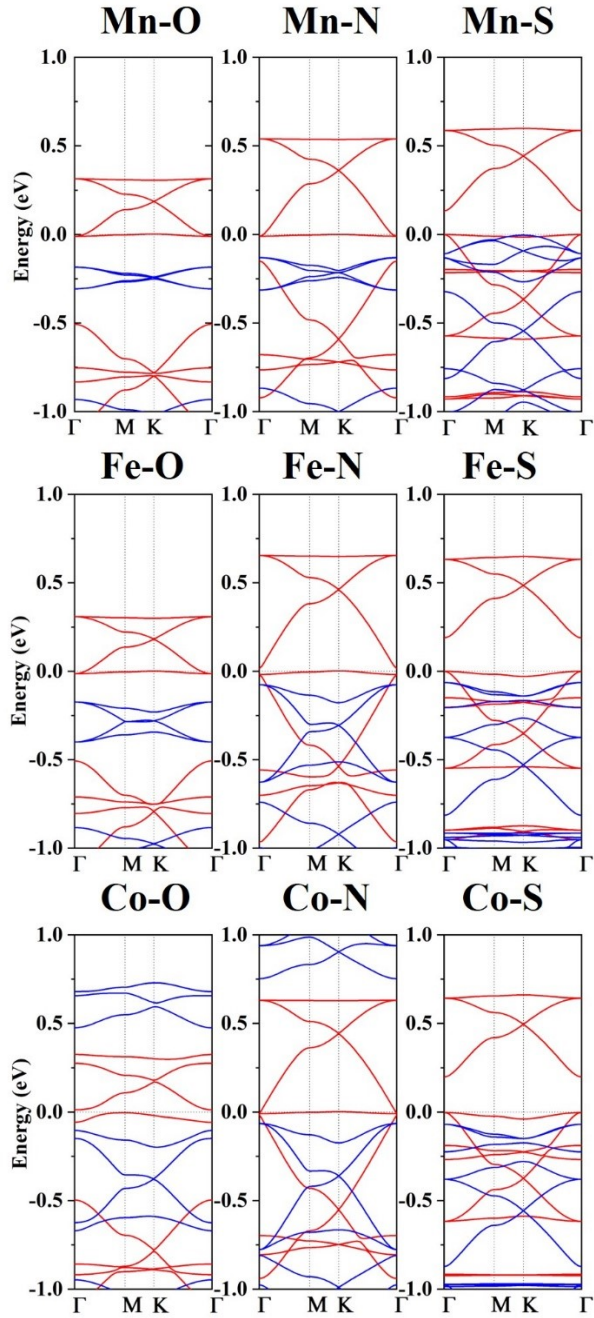

**Figure S2.** Spin-resolved band structures of monolayer  $M_3X_2$  in its FM ground state, with  $M = \text{Mn, Fe, and Co}$ ;  $X = \text{HHTP, HITP, and HTTP}$  in which the coordination atom is O, N, and S respectively. The red and blue lines represent two spin channels. The Fermi level has been shifted to 0.

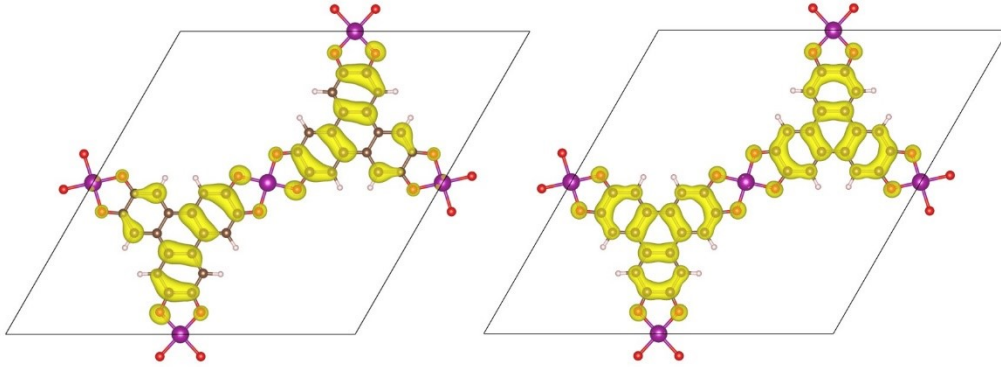

**Figure S3.** Partial charge density distributions of the bottom flat band coinciding with the Fermi level in monolayer  $\text{Mn}_3(\text{HHTP})_2$ . The charge density distribution at the M and K points in the first Brillouin zone is shown on the left and right panels, respectively. The iso-value is  $0.0005 \text{ e/Bohr}^3$ .

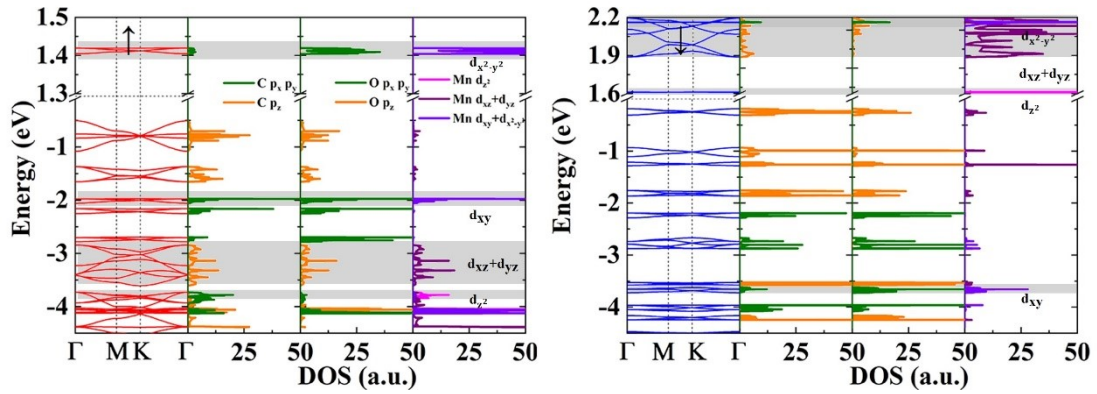

**Figure S4.** Spin-resolved band structure and partial density of states (pDOS) of monolayer  $\text{Mn}_3(\text{HHTP})_2$  in its FM ground state. The red and blue lines in the band structure represent majority (left panel) and minority (right panel) spin channels, respectively. The locations of both unoccupied and occupied d-bands of metal ions are shaded in grey.

**Mn-O**

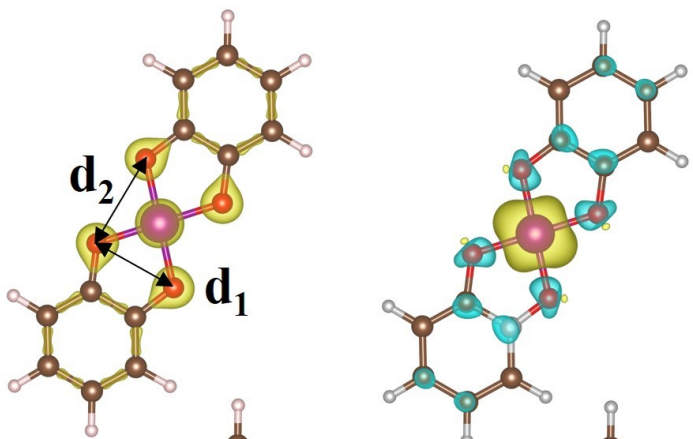

**Mn-N**

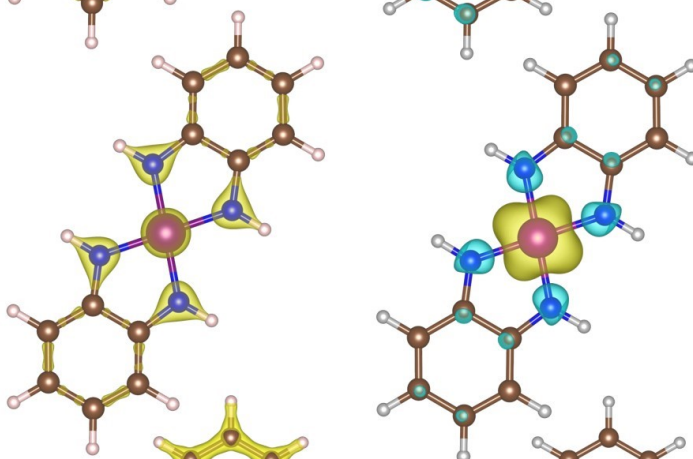

**Mn-S**

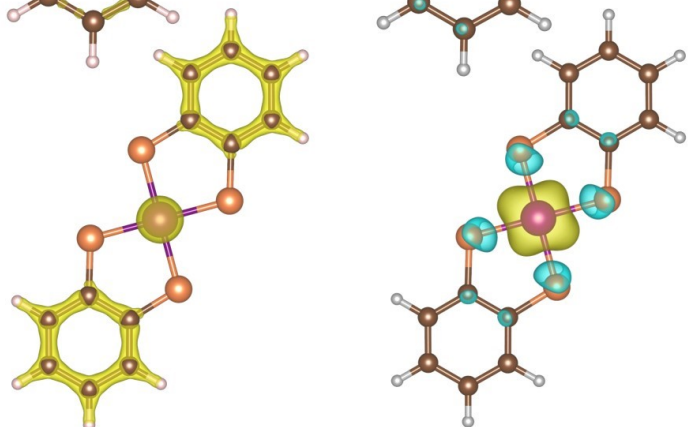

**Figure S5.** Total charge density distribution (left, isovalue is 0.3 e/Bohr<sup>3</sup>) and spin density distribution (right, isovalue is 0.005 e/Bohr<sup>3</sup>) in the secondary building units of Mn<sub>3</sub>(HHTP)<sub>2</sub>, Mn<sub>3</sub>(HITP)<sub>2</sub>, and Mn<sub>3</sub>(HTTP)<sub>2</sub>.

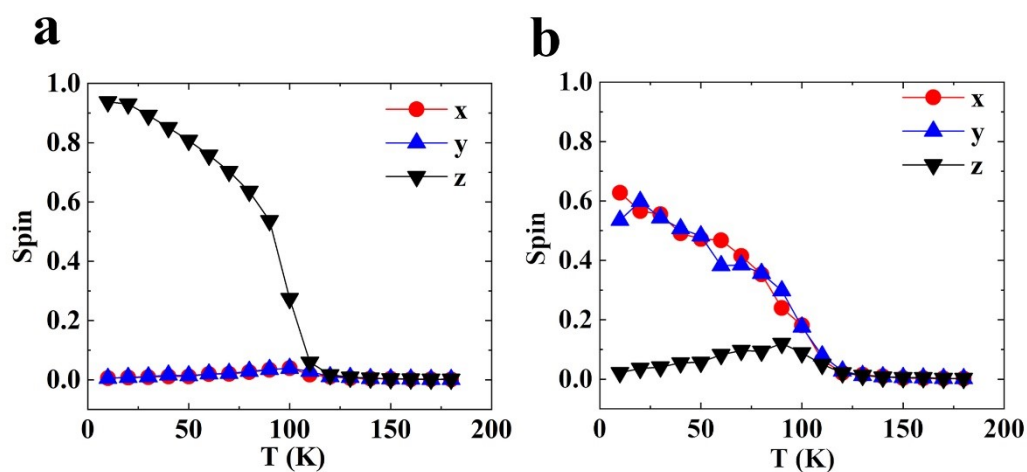

**Figure S6.** Three normalized spin components per magnetic site as a function of the temperature in a) Mn<sub>3</sub>(HHTP)<sub>2</sub> and b) Fe<sub>3</sub>(HHTP)<sub>2</sub> from the Monte Carlo simulation.

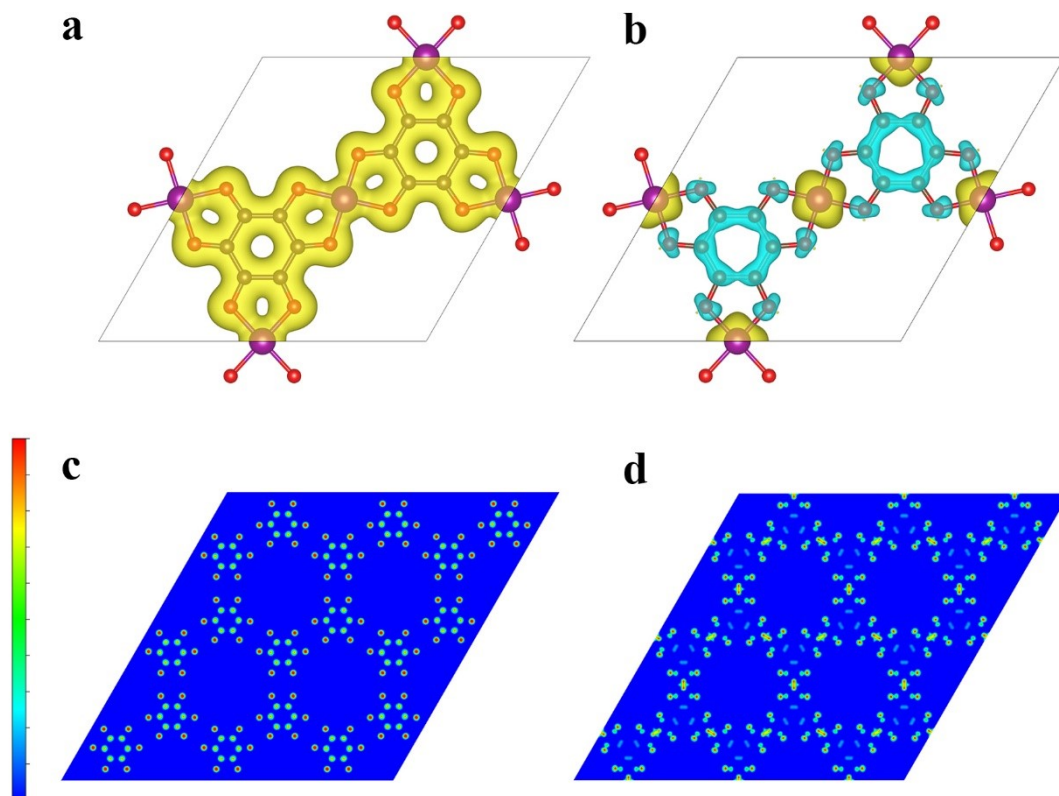

**Figure S7.** a) Charge density and b) spin density distribution of monolayer  $\text{Mn}_3(\text{THQ})_2$  in its FM ground state. The isovalue is  $0.005 \text{ e/Bohr}^3$ . Simulated STM topographies with bias of c)  $0 \text{ eV}$  and d)  $-2.21 \text{ eV}$  corresponding to the honeycomb itinerant band and kagome d-band, respectively.

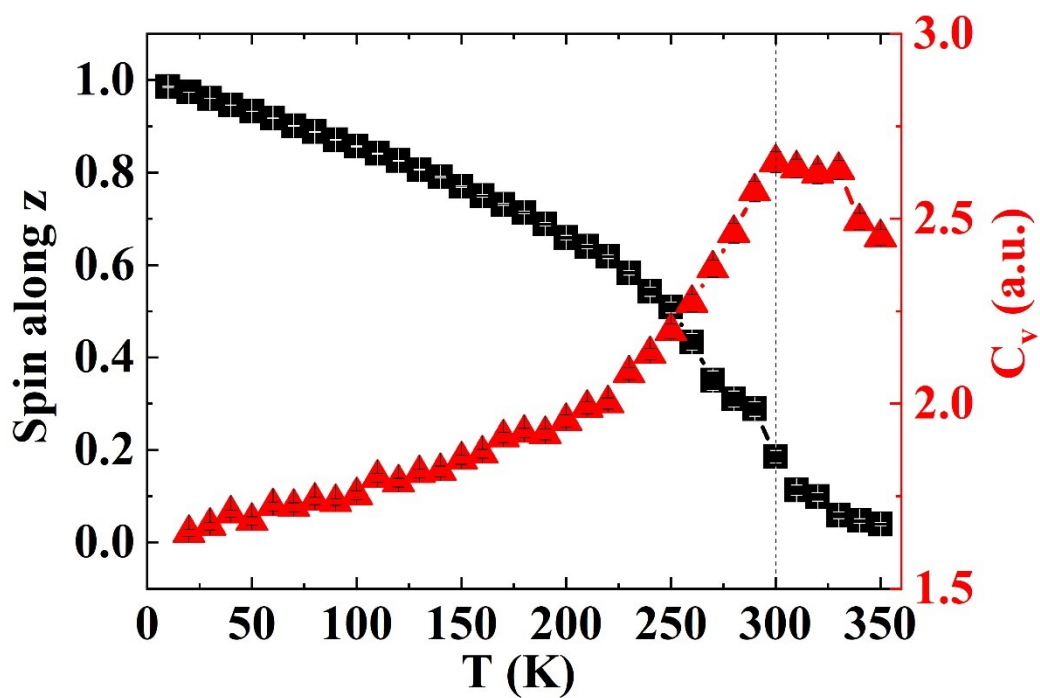

**Figure S8.** Normalized spin per Mn ion and heat capacity changing with the temperature in monolayer  $\text{Mn}_3(\text{THQ})_2$  with 1.5 e/f.u. hole doping from the Monte Carlo simulation.



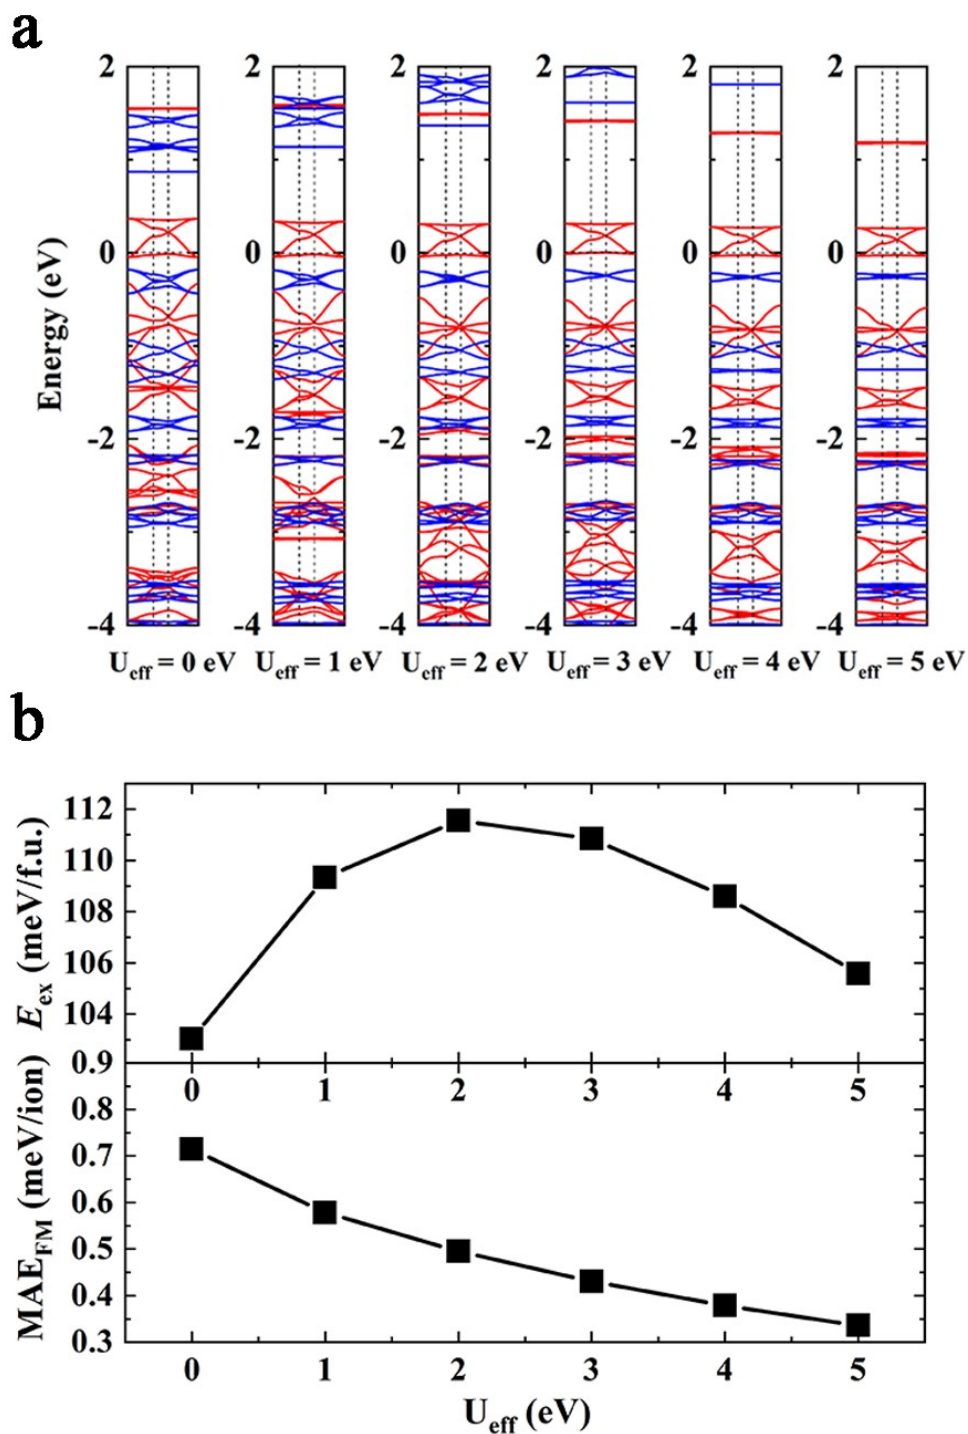

**Figure S9.** a) Spin-resolved band structures of monolayer  $\text{Mn}_3(\text{HHTP})_2$  in its FM ground state calculated by the PBE+U method with different on-site Coulomb repulsion energy  $U_{\text{eff}} = U - J$ . It shows that the four-bands of organic ligands on the honeycomb lattice sitting right above the Fermi level are barely influenced by  $U_{\text{eff}}$ . b) Exchange energy  $E_{\text{ex}}$  and magnetic anisotropy energy of the FM configuration  $\text{MAE}_{\text{FM}}$  calculated with different  $U_{\text{eff}}$ .



**Table S1.** Optimized lattice parameters of monolayer  $M_3X_2$  ( $M = \text{Mn, Fe, and Co}$ ;  $X = \text{HHTP, HITP, and HTTP}$ ). All these MOFs share the same honeycomb-kagome lattice symmetry with  $a = b$ ,  $\alpha = \beta = 90^\circ$ ,  $\gamma = 60^\circ$ .

| $a$ (Å) | Mn     | Fe     | Co     |
|---------|--------|--------|--------|
| HHTP    | 21.726 | 21.537 | 21.514 |
| HITP    | 22.273 | 21.967 | 21.933 |
| HTTP    | 23.451 | 23.288 | 23.212 |

**Table S2.** Geometric parameters of the square-planar coordination environment in Mn MOFs. The  $d_1(d_2)$  denotes the distance between two nearest-neighbor coordination atoms from the same(different) organic ligand, as illustrated in Figure S5. The values in the parentheses are those calculated for the secondary building units.

| Donor atom | Coordination bond length (Å) | $d_1$ (Å) | $d_2$ (Å) |
|------------|------------------------------|-----------|-----------|
| O          | 1.874                        | 2.544     | 2.754     |
|            | (1.833)                      | (2.463)   | (2.716)   |
| N          | 1.936                        | 2.529     | 2.932     |
|            | (1.906)                      | (2.494)   | (2.886)   |
| S          | 2.206                        | 3.141     | 3.099     |
|            | (2.175)                      | (3.071)   | (3.079)   |

**Table S3.** Relative energies (meV) of each 2D MOF with different magnetic configurations.

| $E$                 | Mn-O    | Mn-N   | Mn-S  | Fe-O    | Fe-N   | Fe-S   | Co-O    | Co-N   | Co-S  |
|---------------------|---------|--------|-------|---------|--------|--------|---------|--------|-------|
| $E_{FM}^\perp$      | 0       | 0      | 0     | 0.303   | 0      | 0      | 1.231   | 0.834  | 0.901 |
| $E_{FM}^\parallel$  | 1.291   | 1.225  | 1.145 | 0       | 0.925  | 0.814  | 0       | 0      | 0     |
| $E_{FIM}^\perp$     | 111.366 | 46.463 | 3.750 | 120.422 | 28.311 | 12.004 | 100.022 | 27.672 | N.A.  |
| $E_{FIM}^\parallel$ | 112.664 | 47.692 | 4.900 | 120.120 | 29.082 | 12.829 | 98.909  | 26.996 | N.A.  |

**Table S4.** Parameters in the generalized Hamiltonian model and Curie temperature of monolayer  $M_3X_2$  ( $M = \text{Mn, Fe, and Co}$ ;  $X = \text{THQ, HHTP, HITP, and HTTP}$ ). The coordination atom is O for THQ and HHTP, N for HITP, and S for HTTP.

| Metal | Donor atom | $J$ (meV)         | $A$ (meV) | $B$ (meV)             | $T_c$ (K) |
|-------|------------|-------------------|-----------|-----------------------|-----------|
| Mn    | O (THQ)    | 16.374            | 0.188     | $2.8 \times 10^{-4}$  | 250       |
|       | O (HHTP)   | 6.187             | 0.192     | $-3.9 \times 10^{-4}$ | 100       |
|       | N          | 2.581             | 0.182     | $-2.1 \times 10^{-4}$ | 45        |
|       | S          | 0.209             | 0.170     | $-2.9 \times 10^{-4}$ | 5         |
| Fe    | O          | 15.015            | -0.104    | 0.001                 | 110       |
|       | N          | 3.520             | 0.270     | 0.019                 | 30        |
|       | S          | 1.502             | 0.274     | -0.001                | 15        |
| Co    | O          | 49.454            | -1.524    | -0.059                | 90        |
|       | N          | 13.498            | -0.954    | -0.079                | 25        |
|       | S          | N.A. <sup>1</sup> | N.A.      | N.A.                  | N.A.      |

<sup>1</sup>The FIM configuration is not stable, which always relaxes to the FM one.
